# Supplementary material for: What stabilizes close arginine pairing in proteins?
Source: Royal Society of Chemistry journal article supplement (doi:10.1039/c3cp00160a), 2013-01-01
Supplement: c3cp00160a.pdf [file c3cp00160a.pdf]

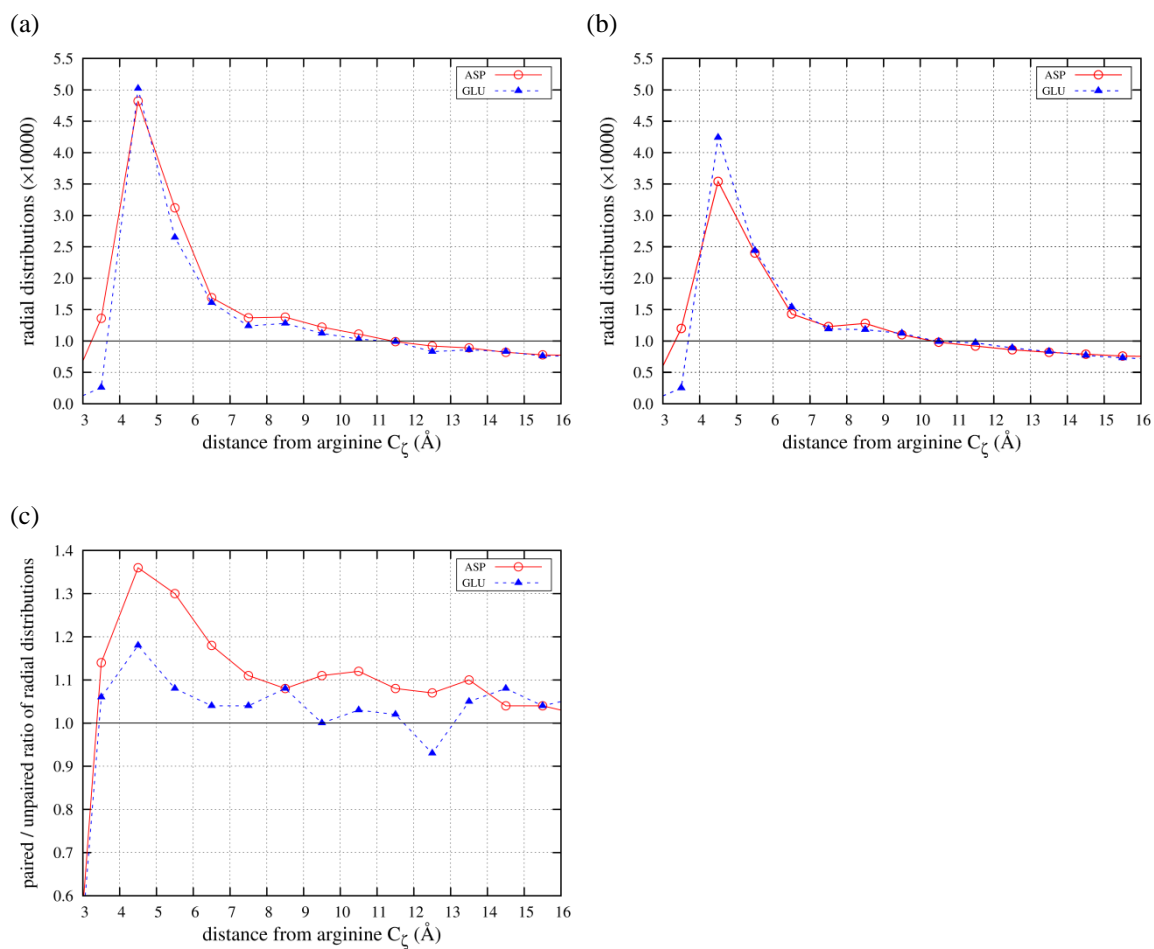

**Fig. S1.** Radial distribution of negatively charged residues (Asp, Glu) around (a) paired and (b) unpaired arginines and (c) the ratio of the two distributions.

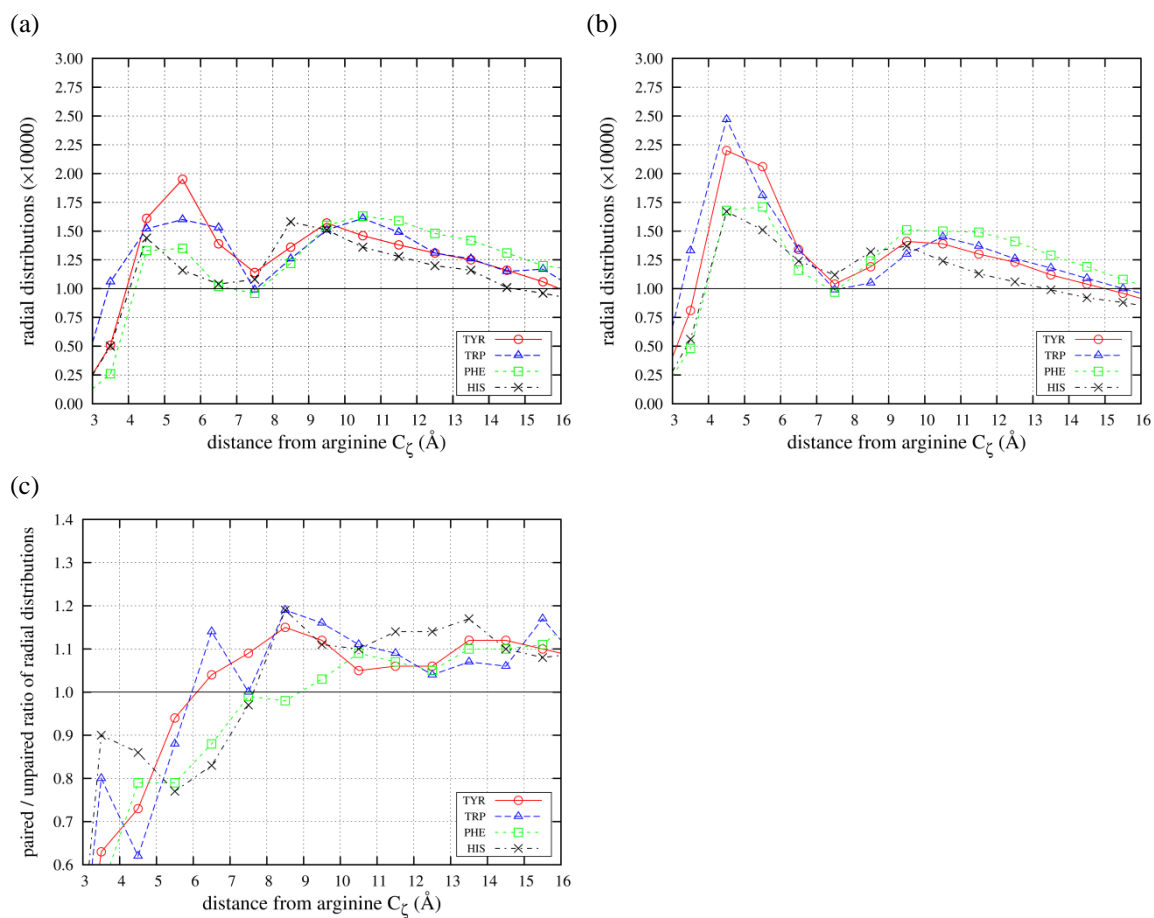

**Fig. S2.** Radial distribution of aromatic residues (Tyr, Trp, Phe, His) around (a) paired and (b) unpaired arginines and (c) the ratio of the two distributions.

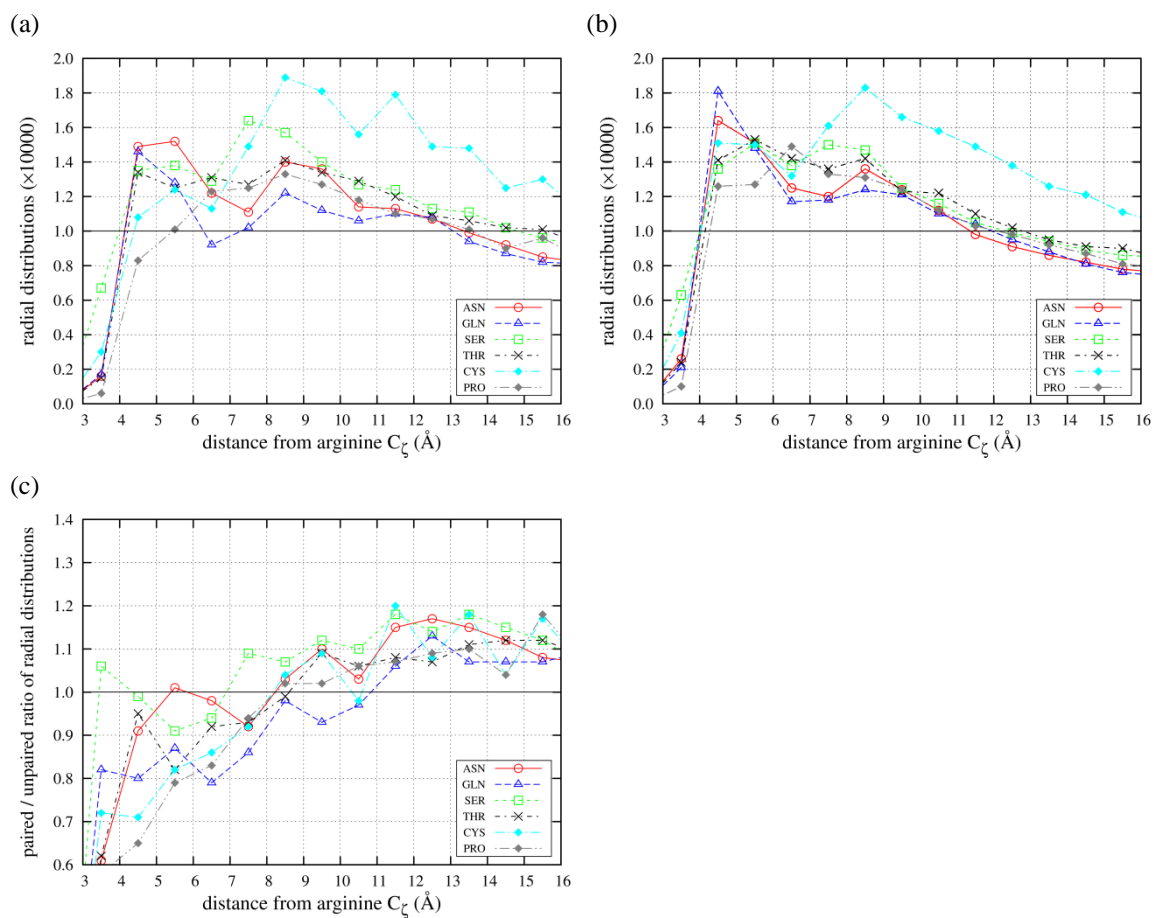

**Fig. S3.** Radial distribution of polar residues (Asn, Gln, Ser, Thr, Cys, Pro) around (a) paired and (b) unpaired arginines and (c) the ratio of the two distributions.

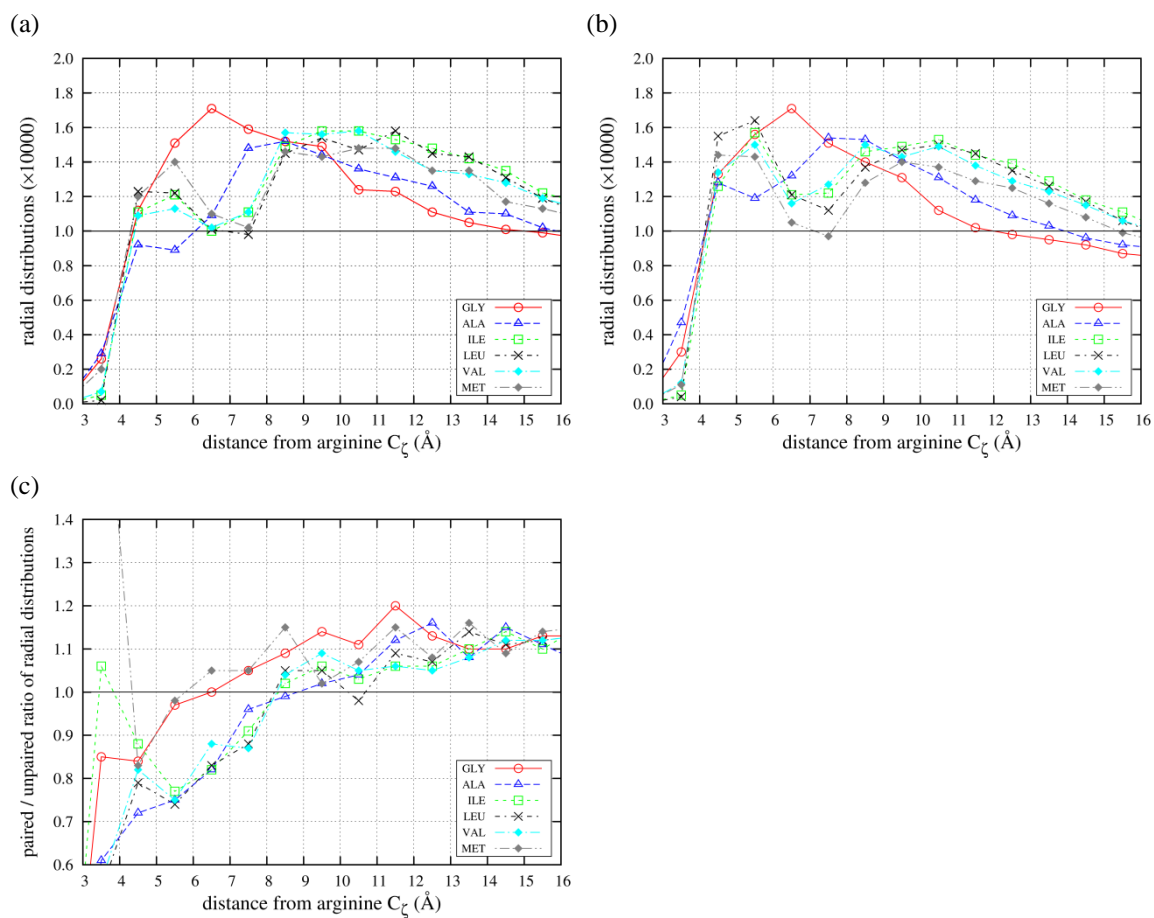

**Fig. S4.** Radial distribution of aliphatic residues (Gly, Ala, Ile, Leu, Val, Met) around (a) paired and (b) unpaired arginines and (c) the ratio of the two distributions.
